# Supplementary material for: Sensitization of lanthanide luminescence by two different Pt → Ln energy transfer pathways in PtLn3 heterotetranuclear complexes with 5-ethynyl-2,2′-bipyridine
Source: Royal Society of Chemistry journal article supplement (doi:10.1039/b801573b), 2008-01-01
Supplement: b801573b.pdf [file b801573b.pdf]

# Electronic Supporting Information (ESI)

## **Sensitization of lanthanide luminescence by two different Pt→Ln energy transfer pathways in PtLn<sub>3</sub> heterotetranuclear complexes with 5-ethynyl-2,2'-bipyridine**

Hai-Bing Xu, Li-Yi Zhang, Zhong-Hui Chen, Lin-Xi Shi and Zhong-Ning Chen\*

*State Key Laboratory of Structural Chemistry, Fujian Institute of Research on the Structure of  
Matter, the Chinese Academy of Sciences, Fuzhou, Fujian 350002, China*

e-mail: [czn@fjirsm.ac.cn](mailto:czn@fjirsm.ac.cn)

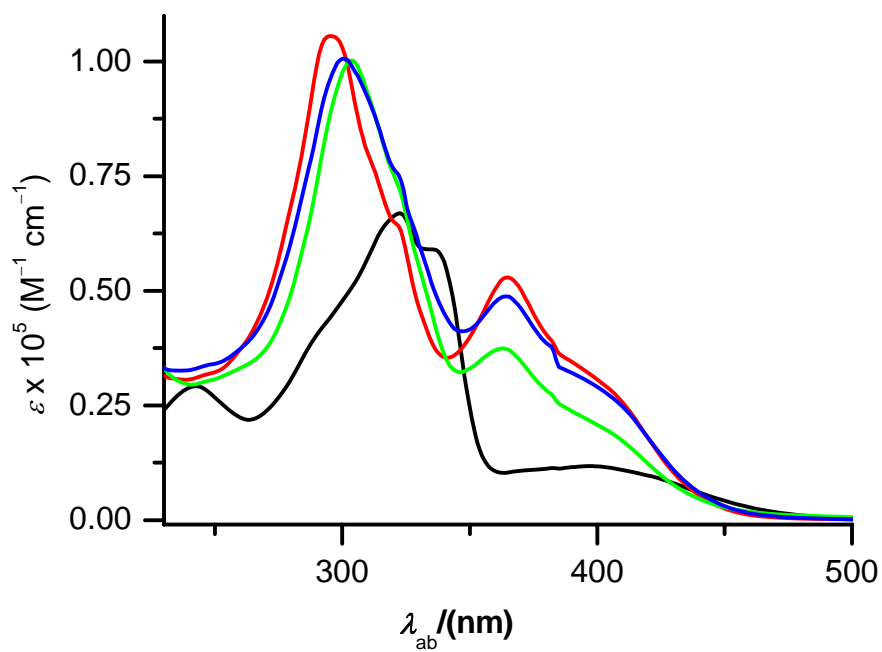

**Figure S1.** UV-vis electronic absorption spectra of **1** (black), **2** (green), **3** (blue), and **4** (red) in dichloromethane.

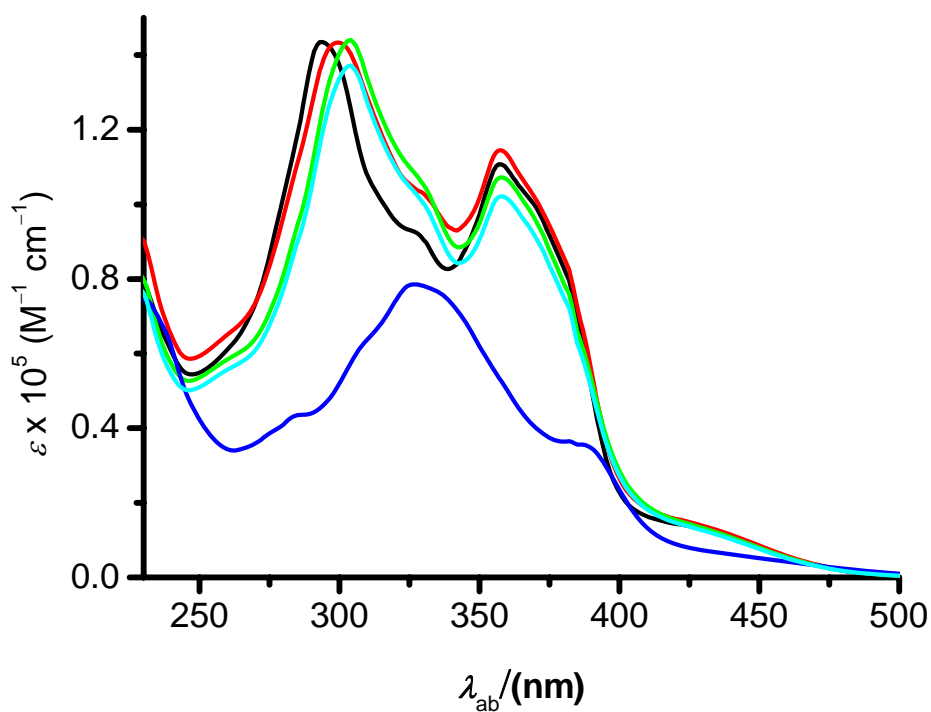

**Figure S2.** UV-vis electronic absorption spectra of **5** (blue), **6**(green), **7** (red), **8** (cyan) and **9** (black) in dichloromethane.

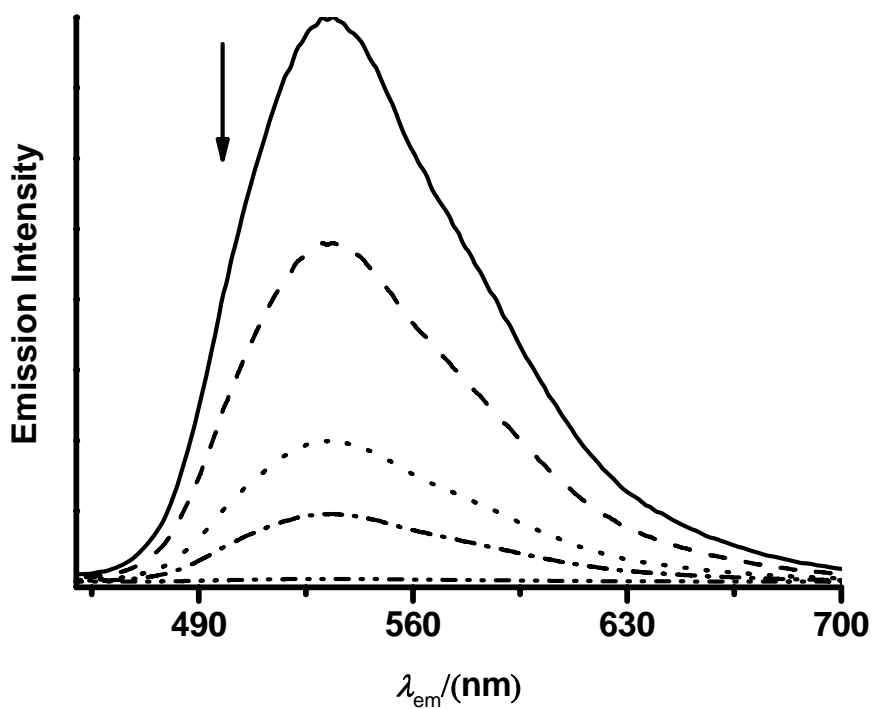

**Figure S3.** Titration of **1** with Yb(hfac)<sub>3</sub>(H<sub>2</sub>O)<sub>2</sub> in dichloromethane solution, showing the quenching of the bpyPt<sup>II</sup>(acetylide)<sub>2</sub>-based emission.

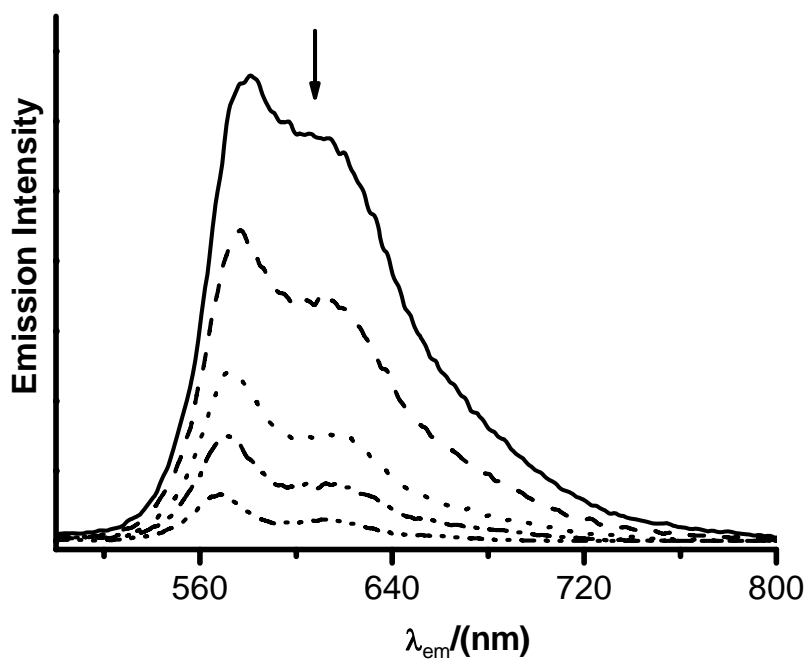

**Figure S4.** Titration of **5** with Yb(hfac)<sub>3</sub>(H<sub>2</sub>O)<sub>2</sub> in dichloromethane solution, showing the partly quenching of the Pt(C≡Cbpy)<sub>4</sub>-based emission.

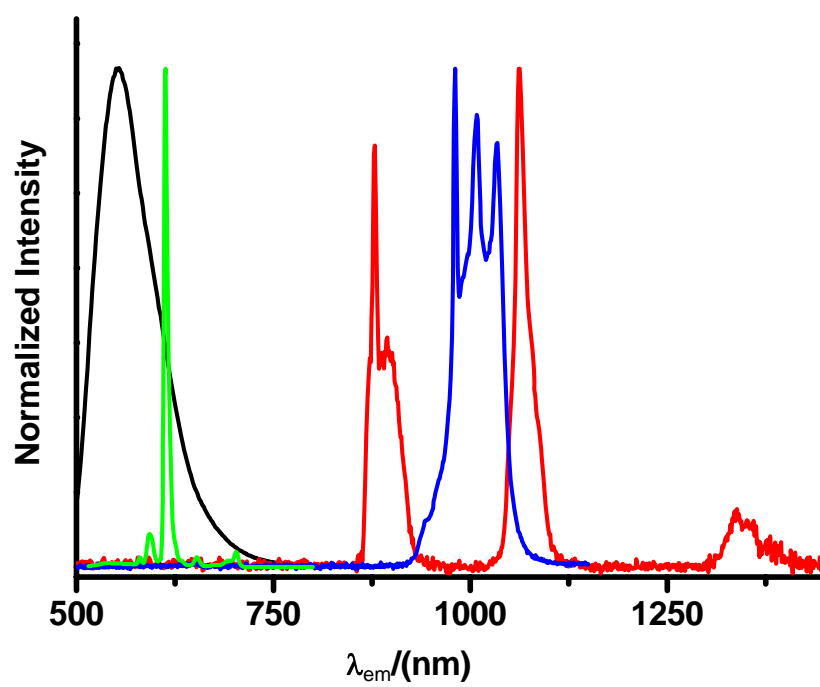

**Figure S5.** Emission spectra of **1** (black), **2** (red), **3** (green), and **4** (blue) in dichloromethane solutions at 298 K.
